# Supplementary material for: Density Functional Theory Study of Methanol Steam Reforming on Pt3Sn(111) and the Promotion Effect of a Surface Hydroxy Group
Source: MDPI journal article supplement (doi:10.3390/nano14030318), 2024-02-05
Supplement: s1 [file s1]

## Supporting Information

# Density Functional Theory Study of Methanol Steam Reforming on Pt<sub>3</sub>Sn(111) and the Promotion Effect of a Surface Hydroxy Group

Ping He <sup>1,2</sup>, Houyu Zhu <sup>2,\*</sup>, Qian Yao Sun <sup>3</sup>, Ming Li <sup>3</sup>, Dongyuan Liu <sup>2</sup>, Rui Li <sup>2</sup>, Xiaoqing Lu <sup>2</sup>, Wen Zhao <sup>2</sup>, Yuhua Chi <sup>2</sup>, Hao Ren <sup>2</sup> and Wenyue Guo <sup>1,2,\*</sup>

<sup>1</sup> College of Science, China University of Petroleum (East China), Qingdao 266580, China; s21090045@s.upc.edu.cn

<sup>2</sup> School of Materials Science and Engineering, China University of Petroleum (East China), Qingdao 266580, China; b21140013@s.upc.edu.cn (D.L.); s21140007@s.upc.edu.cn (R.L.); luxq@upc.edu.cn (X.L.); zhaowen@upc.edu.cn (W.Z.); chiyuhua@upc.edu.cn (Y.C.); renh@upc.edu.cn (H.R.)

<sup>3</sup> SINOPEC Dalian Research Institute of Petroleum and Petrochemicals Co. Ltd., Dalian 116045, China; sunqian Yao.fshy@sinopec.com (Q.S.); liming.fshy@sinopec.com (M.L.)

\* Correspondence: hyzhu@upc.edu.cn (H.Z.); wyguo@upc.edu.cn (W.G.)

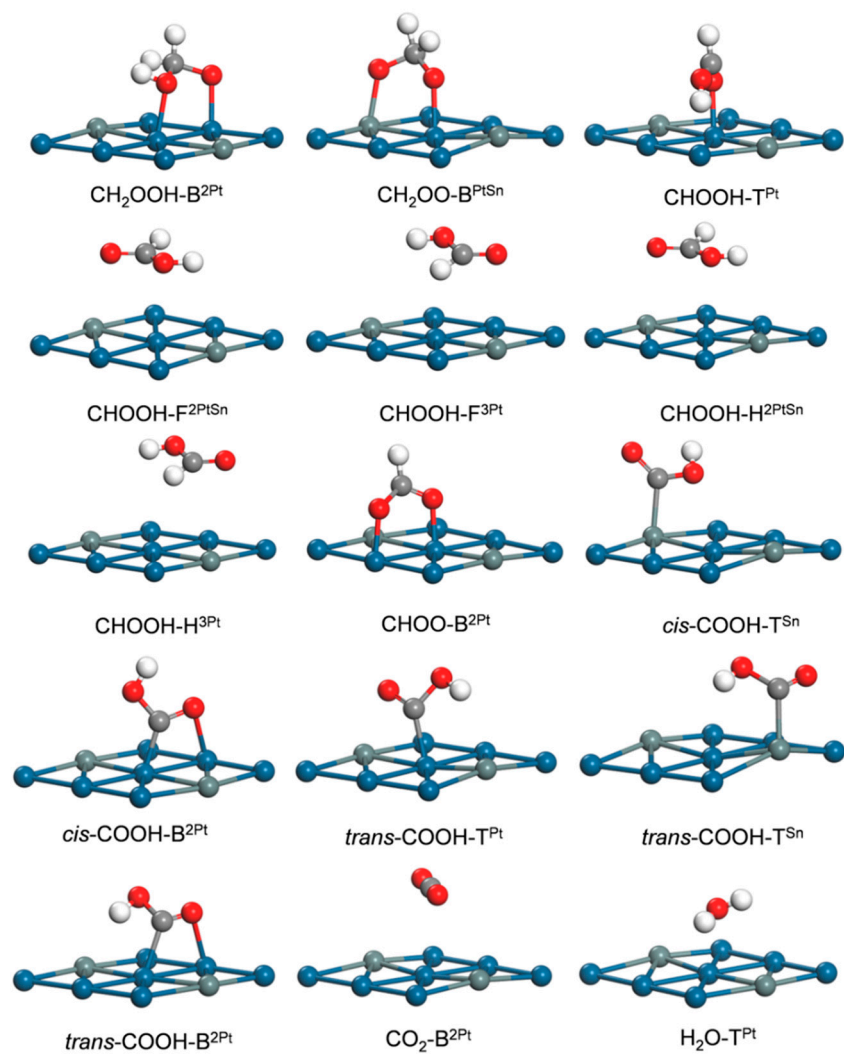

**Figure S1.** The other adsorption configurations of reaction intermediates along reaction pathway of Methanol Steam Reformation (MSR) to CO<sub>2</sub> on Pt<sub>3</sub>Sn(111).

**Table S1.** Sub-stable Adsorption Sites, Energies (in eV) and Structural Parameters (in Angstroms) for Intermediates Involved in MSR on Pt<sub>3</sub>Sn(111).

| Species             | Site <sup>a</sup>                  | Mode                  | $d_{C/O-Pt/Sn}$  | $E_{ads}$ |
|---------------------|------------------------------------|-----------------------|------------------|-----------|
| CH <sub>2</sub> OOH | B <sup>2Pt</sup>                   | $\eta^1(O)-\eta^1(O)$ | 2.14, 2.35       | 1.65      |
|                     | B <sup>PtSn</sup>                  | $\eta^1(O)-\eta^1(O)$ | 2.15, 2.31       | 1.89      |
| CH <sub>2</sub> OO  | B <sup>PtSn</sup>                  | $\eta^1(O)-\eta^1(O)$ | 2.05, 2.07       | 3.08      |
|                     | F <sup>2PtSn</sup>                 | $\eta^2(O)-\eta^1(O)$ | 2.09, 2.26, 2.27 | 3.24      |
| HCOOH               | T <sup>Pt</sup> -V <sup>b</sup>    | $\eta^1(O)$           | 2.41             | 0.38      |
|                     | T <sup>Sn</sup> -V <sup>b</sup>    | $\eta^1(O)$           | 2.58             | 0.49      |
|                     | F <sup>2PtSn</sup> -P <sup>b</sup> |                       |                  | 0.41      |
|                     | F <sup>3Pt</sup> -P <sup>b</sup>   |                       |                  | 0.36      |
|                     | H <sup>2PtSn</sup> -P <sup>b</sup> |                       |                  | 0.39      |
|                     | H <sup>3Pt</sup> -P <sup>b</sup>   |                       |                  | 0.37      |
| CHOO                | B <sup>2Pt</sup>                   | $\eta^1(O)-\eta^1(O)$ | 2.20, 2.20       | 2.28      |
|                     | B <sup>PtSn</sup>                  | $\eta^1(O)-\eta^1(O)$ | 2.17, 2.29       | 2.52      |
| COOH- <i>cis</i>    | T <sup>Pt</sup>                    | $\eta^1(C)$           | 2.03             | 2.48      |
|                     | T <sup>Sn</sup>                    | $\eta^1(C)$           | 2.32             | 1.26      |
| COOH- <i>trans</i>  | B <sup>2Pt</sup>                   | $\eta^1(C)-\eta^1(O)$ | 2.01, 2.36       | 2.37      |
|                     | T <sup>Pt</sup>                    | $\eta^1(C)$           | 2.06             | 2.35      |
|                     | T <sup>Sn</sup>                    | $\eta^1(C)$           | 2.34             | 1.09      |
|                     | B <sup>2Pt</sup>                   | $\eta^1(C)-\eta^1(O)$ | 2.02, 2.37       | 2.39      |
|                     | B <sup>PtSn</sup>                  | $\eta^1(C)-\eta^1(O)$ | 2.04, 2.55       | 2.41      |
| CO <sub>2</sub>     | B <sup>2Pt</sup>                   |                       |                  | 0.11      |
|                     | B <sup>PtSn</sup>                  |                       |                  | 0.11      |
| H <sub>2</sub> O    | T <sup>Pt</sup>                    |                       |                  | 0.01      |
|                     | T <sup>Sn</sup>                    |                       |                  | 0.01      |
| OH                  | T <sup>Pt</sup>                    | $\eta^1(O)$           | 2.04             | 2.34      |
|                     | T <sup>Sn</sup>                    | $\eta^1(O)$           | 2.04             | 2.50      |
|                     | B <sup>2Pt</sup>                   | $\eta^2(O)$           | 2.23, 2.24       | 2.51      |
|                     | B <sup>PtSn</sup>                  | $\eta^2(O)$           | 2.25, 2.27       | 2.49      |

<sup>a</sup> V and P represent the O-H axis almost vertical and parallel to the surface.
